# Supplementary material for: The in vivo structure of biological membranes and evidence for lipid domains
Source: PLoS Biol. 2017 May 23;15(5):e2002214. doi: 10.1371/journal.pbio.2002214 (PMC5441578; doi:10.1371/journal.pbio.2002214)
Supplement: S1 Text — (DOCX) [file pbio.2002214.s012.docx]

# The in vivo structure of biological membranes and evidence for lipid domains

Jonathan D. Nickels1,2,3, ☯, Sneha Chatterjee2,4, ☯, Christopher B. Stanley2, Shuo Qian2, Xiaolin Cheng5,6, Dean A.A. Myles2, Robert F. Standaert1,2,6,*, James G. Elkins4,7,*, and John Katsaras1,2,3,*

1Shull Wollan Center — a Joint Institute for Neutron Sciences, Oak Ridge National Laboratory Oak Ridge, Tennessee, United States

2Biology & Soft Matter Division, Oak Ridge National Laboratory, Oak Ridge, Tennessee, United States

3Department of Physics & Astronomy, University of Tennessee, Knoxville, Tennessee, United States

4Biosciences Division, Oak Ridge National Laboratory, Oak Ridge, Tennessee, United States

5Center for Molecular Biophysics, Oak Ridge National Laboratory, Oak Ridge, Tennessee, United States

6 Department of Biochemistry & Cellular and Molecular Biology, University of Tennessee, Knoxville, Tennessee, United States

7Department of Microbiology, University of Tennessee, Knoxville, Tennessee, United States

☯These authors contributed equally to this work.

* [standaertrf@ornl.gov](mailto:standaertrf@ornl.gov) (RFS); [elkinsjg@ornl.gov](mailto:elkinsjg@ornl.gov) (JGE); [katsarasj@ornl.gov](mailto:katsarasj@ornl.gov) (JK)

**This Document Contains:**

**6 Supporting Tables**

**Table A. Abundances and selected physical properties of major cellular species.**

| Species | Mass %a,b | Densityb  (g/cm3) | Volume % | ρHc  (fm/Å3) | ΔρXDc  (fm/Å3) | ΔρCDc  (fm/Å3) |
| --- | --- | --- | --- | --- | --- | --- |
| Proteind | 12.99 | 1.39 | 9.92 | 0.190 | 0.137 | 0.472 |
| RNAe | 4.41 | 1.76 | 2.67 | 0.345 | 0.106 | 0.262 |
| DNAf | 0.64 | 1.67 | 0.41 | 0.318 | 0.066 | 0.317 |
| CHOg | 0.69 | 1.43 | 0.51 | 0.181 | 0.132 | 0.440 |
| Lipidh | 1.27 | 0.98 | 1.38 | –0.035 | 0.000 | 0.668 |
| Water | 80.00 | 1.00 | 85.11 | –0.056 | 0.696 | 0.000 |

a) Overall dry composition data from Bishop [1] were used with an assumed water content of 80% by weight.

b) Mass percentages and densities, which vary with deuteration, are reported for all-H species. Volume percentages were assumed to be invariant with deuteration.

c) ρH refers to the neutron scattering length density of all-H material. Δ*ρ* Refers to the change in *ρ* resulting from substitution of deuterium for all water-exchangeable (XD, X = N, O or S) or all water-nonexchangeable (CD) hydrogen atoms with deuterium, as denoted by the subscript. All neutron scattering lengths are from Sears [2] and were obtained through the NIST Center for Neutron Research (https://www.ncnr.nist.gov/resources/n-lengths/).

d) Residue volumes for amino acids were from Zamyatnin [3]. Density was calculated from residue volumes weighted by the amino acid composition in Table B.

e) The composition for *B. subtilis* RNA was from Midgley [4], and residue volumes were from Voss and Gerstein [5]. Density was calculated from the composition and residue volumes.

f) The G+C content of *B. subtilis* 168 DNA (43.5%) was from the genomic sequence [6], and residue volumes were from Nadassy et al. [7] Density was calculated from the composition and residue volumes.

g) Carbohydrate (CHO) was approximated as chitin, i.e., poly(*N*-acetylglucosamine) with an experimental density of 1.425 as reported by Li, et al [8].

h) Lipid is taken as the hydrocarbon portion of membrane fatty acids based on scattering length densities and composition given in Table B and Table D, respectively.

**Table B. Fatty acid composition and deuteration of samples in Figs 1 and 2. Additional information can be found in S3 Fig.**

| Fatty Acid | Relative Abundance H2O Medium | Relative Abundance 90% D2O Medium | FAME [M]+• (m/z) H2O Medium | FAME [M]+• (m/z) 90% D2O Medium | FA hydrogen atoms | Deuterationa |
| --- | --- | --- | --- | --- | --- | --- |
| *i*14:0 | 4% | 3% | 242.1 | 261.3 | 27 | 71.1% |
| *i*15:0 | 24% | 26% | 256.3 | 276.4 | 29 | 69.3% |
| *a*15:0 | 35% | 30% | 256.3 | 275.4 | 29 | 65.9% |
| *i*16:0 | 12% | 10% | 270.3 | 291.4 | 31 | 68.1% |
| *n*16:0 | 4% | 4% | 270.2 | 292.3 | 31 | 71.3% |
| *i*17:0 | 13% | 19% | 284.3 | 307.4 | 33 | 70.0% |
| *a*17:0 | 9% | 8% | 284.3 | 307.5 | 33 | 70.3% |

a) Percent deuteration is calculated as 100*Δ(m/z) / FA hydrogen atoms, where Δ(m/z) is the increase in m/z for the molecular ion [M]+• from growth in deuterated medium.

**Table C. Abundance and deuteration of cellular amino acids. (Notes on next page)**

| AA (abundance)a | nCHb | Fragmentc | Mass Range | Calc'd MW | Experimental Molecular Weightsd | | | *B. sub.* %D avg.e |
| --- | --- | --- | --- | --- | --- | --- | --- | --- |
| H-Algal (error) | D-Algal (%D) | *B. Sub.* (%D) |
| Ala (11.97%) | 4 | M − C5H9O  M − C4H9 | 232–240  260–268 | 232.49  260.50 | 232.35 (-0.14)  260.35 (-0.15) | 236.27 (98.0)  264.29 (98.4) | 234.83 (62.0)  262.84 (62.2) | 62.1 |
| Arg (3.99%) | 7 |  |  |  |  |  |  | 64.1 (Glu) |
| Asn (3.71%) | 3 |  |  |  |  |  |  | 41.8 (Asp) |
| Asp (4.88%) | 3 | M − C5H9O  M − C4H9 | 390–397  418–425 | 390.76  418.77 | 390.71 (-0.05)  418.70 (-0.07) | 393.32 (86.8)  421.33 (87.5) | 391.96 (41.7)  419.96 (41.9) | 41.8 |
| Cys (1.21%) | 3 |  |  |  |  |  |  | 42.6 (Ser) |
| Gln (4.45%) | 5 |  |  |  |  |  |  | 64.1 (Glu) |
| Glu (8.43%) | 5 | M − C7H15O2Si  M − C5H9O  M − C4H9 | 330–339  404–413  432–441 | 330.63  404.79  432.80 | 330.55 (-0.09)  404.64 (-0.15)  432.69 (-0.11) | 335.15 (92.1)  409.31 (93.5)  437.31 (92.5) | 333.72 (63.5)  407.90 (65.1)  435.87 (63.7) | 64.1 |
| Gly (9.98%) | 2 | M − C5H9O  M − C4H9 | 218–224  246–252 | 218.46  246.47 | 218.34 (-0.13)  246.34 (-0.13) | 220.11 (88.5)  248.12 (88.9) | 219.72 (69.2)  247.74 (69.7) | 69.5 |
| His (1.73%) | 5 |  |  |  |  |  |  | 64.1 (Glu) |
| Ile (5.80%) | 10 | M − C7H15O2Si  M − C5H9O | 200–214  274–288 | 200.42  274.57 | 200.25 (-0.16)  274.37 (-0.20) | 210.07 (98.2)  284.21 (98.4) | 206.34 (60.9)  280.48 (61.1) | 61.0 |
| Leu (7.42%) | 10 | M − C5H9O | 274–288 | 274.57 | 274.37 (-0.20) | 284.25 (98.8) | 280.35 (59.8) | 59.8 |
| Lys (6.89%) | 9 |  |  |  |  |  |  | 60.0 (estimate) |
| Met (2.38%) | 8 | M − C7H15O2Si  M − C5H9O  M − C4H9 | 218–230  292–306  320–332 | 218.45  292.61  320.62 | 218.32 (-0.13)  292.45 (-0.16)  320.46 (-0.16) | 226.17 (98.1)  300.41 (99.6)  328.31 (98.1) | 222.78 (55.8)  297.01 (57.1)  324.95 (56.1) | 56.3 |
| Phe (3.69%) | 8 | M − C5H9O  M − C4H9 | 308–320  336–348 | 308.59  336.60 | 308.40 (-0.19)  336.41 (-0.19) | 316.29 (98.7)  344.31 (98.8) | 311.88 (43.4)  339.89 (43.5) | 43.5 |
| Pro (3.53%) |  |  |  |  |  |  |  | 64.1 (Glu) |
| Ser (4.82%) | 3 | M − C7H15O2Si  M − C5H9O  M − C4H9 | 288–295  362–369  390–397 | 288.60  362.75  390.76 | 288.39 (-0.21)  362.52 (-0.23)  390.53 (-0.23) | 291.32 (97.7)  365.44 (97.3)  393.46 (97.6) | 289.68 (43.0)  363.80 (42.6)  391.80 (42.3) | 42.6 |
| Thr (4.82%) | 5 | M − C5H9O  M − C4H9 | 376–385  404–413 | 376.78  404.79 | 376.48 (-0.29)  404.53 (-0.25) | 381.46 (99.5)  409.46 (98.6) | 379.94 (69.1)  407.97 (68.8) | 68.9 |
| Trp (1.03%) | 8 |  |  |  |  |  |  | 0.00 (added to medium) |
| Tyr (2.52%) | 7 |  |  |  |  |  |  | 43.5 (Phe) |
| Val (6.75%) | 8 | M − C5H9O  M − C4H9 | 260–272  288–300 | 260.54  288.55 | 260.36 (-0.18)  288.37 (-0.18) | 268.24 (98.5)  296.27 (98.7) | 264.63 (53.4)  292.66 (53.6) | 53.5 |

a) The experimental amino acid composition for *B. subtilis* was from Sauer et al. [9] The abundance of tryptophan along with the ratios for aspartate/asparagine (1.31) and glutamate/glutamaine (1.89) were not determined by Sauer et al., and the missing values were taken from the genomic average [10].

b) Number of skeletal hydrogens (C–H).

c) Parent compounds are bis(*tert*-butyldimethylsilyl) derivatives for Ala, Gly, Ile, Leu, Met, Phe and Val or tris(*tert*-butyldimethylsilyl) derivatives for Asp, Glu and Thr. Fragments used for molecular weight determination were selected from those validated for isotopomer analysis by Antoniewicz, et al. [11], and all retain the full complement of skeletal hydrogens.

d) Mass spectral data were recorded at unit resolution. Molecular weights *Mr* were calculated as the average mass across the distribution of isotopomers, i.e., *Mr* = Σ*m**mIm /* Σ*m**Im*, where *Im* is the signal intensity, for all *m* in the indicated mass ranges. For the H-algal amino acid standards, the mass error (experimental – calculated) is reported. For deuterated amino acids, the extent of deuteration was calculated by substracting the molecular weight of the corresponding H-species from that of the deuterated species, and dividing the difference by the number of skeletal hydrogens.

e) Where an experimental value was unavailable, the value for a biosynthetic precursor (specified in parentheses) was used in most cases.

**Table D. Neutron scattering length and scattering length density calculated from atomic scattering lengths [2], isotopic content, and molecular volume [12].**

| Neutron Scattering Lengths (B) | | | | | | | | | |
| --- | --- | --- | --- | --- | --- | --- | --- | --- | --- |
| Element | | C | O | N | P | H | D |  |  |
| Coherent B (fm) | | 6.65 | 5.80 | 9.36 | 5.13 | -3.74 | 6.67 |  |  |
|  |  |  |  |  |  |  |  |  |  |
| Neutron Scattering Length Density Calculations, (ρ=B/Volume) | | | | | | | | | |
|  | Volume (Å3) | C | O | N | P | H | D | B (fm) | ρ (fm/Å3) |
| Solvent | | | | | | | | | |
| D2O | 30.4 | 0 | 1 | 0 | 0 | 0 | 2 | 19.15 | 0.63 |
| H2O | 30.4 | 0 | 1 | 0 | 0 | 2 | 0 | -1.68 | -0.06 |
| Hydrogenous Fatty Acids | | | | | | | | | |
| *i*14:0 | 408.5 | 13 | 0 | 0 | 0 | 27 | 0 | -14.6 | -0.04 |
| *i*15:0 | 436.4 | 14 | 0 | 0 | 0 | 29 | 0 | -15.4 | -0.04 |
| *a*15:0 | 436.4 | 14 | 0 | 0 | 0 | 29 | 0 | -15.4 | -0.04 |
| *i*16:0 | 464.3 | 15 | 0 | 0 | 0 | 31 | 0 | -16.3 | -0.04 |
| *n*16:0 | 444.2 | 15 | 0 | 0 | 0 | 31 | 0 | -16.3 | -0.04 |
| *i*17:0 | 492.2 | 16 | 0 | 0 | 0 | 33 | 0 | -17.1 | -0.03 |
| *a*17:0 | 492.2 | 16 | 0 | 0 | 0 | 33 | 0 | -17.1 | -0.03 |
| Deuterated Fatty Acids | | | | | | | | | |
| *a*15:0 | 436.4 | 14 | 0 | 0 | 0 | 0 | 29 | 286.5 | 0.66 |
| *n*16:0 | 444.2 | 15 | 0 | 0 | 0 | 0 | 31 | 306.5 | 0.69 |
| 70% Deuterated Fatty Acids | | | | | | | | | |
| *i*14:0 | 408.5 | 13 | 0 | 0 | 0 | 7.8 | 19.2 | 185.3 | 0.45 |
| *i*15:0 | 436.4 | 14 | 0 | 0 | 0 | 8.9 | 20.1 | 193.8 | 0.44 |
| *a*15:0 | 436.4 | 14 | 0 | 0 | 0 | 9.9 | 19.1 | 183.5 | 0.42 |
| *i*16:0 | 464.3 | 15 | 0 | 0 | 0 | 9.9 | 21.1 | 203.5 | 0.44 |
| *n*16:0 | 444.2 | 15 | 0 | 0 | 0 | 8.9 | 22.1 | 213.9 | 0.48 |
| *i*17:0 | 492.2 | 16 | 0 | 0 | 0 | 9.9 | 23.1 | 223.4 | 0.45 |
| *a*17:0 | 492.2 | 16 | 0 | 0 | 0 | 9.8 | 23.2 | 224.4 | 0.46 |

**Table E. Fatty acid composition and average ρ of fatty acids extracted from experimental conditions used in Figs 1–4. Values obtained by integration of GC/MS chromatograms shown in Figs 2c, S4 and S10.**

|  | *B. subtilis* 168 H2O M9 | *B. subtilis* Δ*yusL*  90% D2O M9 BSA | *B. subtilis* Δ*yusL* 90% D2O M9 BSA cerulenin *a*15:0 (0:100 D:H) *n*16:0 (0:100 D:H) | *B. subtilis* Δ*yusL* 90% D2O M9 BSA cerulenin *a*15:0 (70:30 D:H) *n*16:0 (70:30 D:H)  (Control Sample) | *B. subtilis* Δ*yusL* 90% D2O M9 BSA cerulenin *a*15:0 (60:40 D:H) *n*16:0 (100:0 D:H)  (Exptl. Sample) |
| --- | --- | --- | --- | --- | --- |
| Fig Nos. | 1, S3 | 2, S3 | 2, 3 | 4, S10 | 4, S10 |
| % H-Fatty Acids | | | | | |
| H-*i*14:0 | 3.8 | 0.0 | 0.0 | 0.0 | 0.0 |
| H-*i*15:0 | 23.9 | 0.0 | 0.0 | 0.0 | 0.0 |
| H-*a*15:0 | 35.2 | 0.0 | 84.0 | 20.2 | 26.0 |
| H-*i*16:0 | 11.5 | 0.0 | 0.0 | 0.0 | 0.0 |
| H-*n*16:0 | 3.7 | 0.0 | 16.0 | 4.1 | 0.0 |
| H-*i*17:0 | 12.9 | 0.0 | 0.0 | 0.0 | 0.0 |
| H-*a*17:0 | 8.9 | 0.0 | 0.0 | 0.0 | 0.0 |
| % Exogenous D-Fatty Acids | | | | | |
| D-*a*15:0 | 0.0 | 0.0 | 0.0 | 62.9 | 49.9 |
| D-*n*16:0 | 0.0 | 0.0 | 0.0 | 12.7 | 24.2 |
| % Endogenous (70% D) Fatty Acids | | | | | |
| *i*14:0 | 0.0 | 3 | 0.0 | 0.0 | 0.0 |
| *i*15:0 | 0.0 | 26 | 0.0 | 0.0 | 0.0 |
| *a*15:0 | 0.0 | 30 | 0.0 | 0.0 | 0.0 |
| *i*16:0 | 0.0 | 10 | 0.0 | 0.0 | 0.0 |
| *n*16:0 | 0.0 | 4 | 0.0 | 0.0 | 0.0 |
| *i*17:0 | 0.0 | 19 | 0.0 | 0.0 | 0.0 |
| *a*17:0 | 0.0 | 8 | 0.0 | 0.0 | 0.0 |
|  | | | | | |
| % Endogenous FAs | 100.0 | 100.0 | 0.0 | 0.0 | 0.0 |
| Average Acyl ρ (fm/Å3) | -0.03 | 0.44 | -0.03 | 0.5 | 0.49 |

**Table F. Experimental compositions and NSLD for proof of concept demonstration with model membranes, shown in Fig S9.**

| **Mole Fractions for POPC/DSCP/Chol. nanodomain forming lipid mixture [13,14,15]** | | | | | | | | |
| --- | --- | --- | --- | --- | --- | --- | --- | --- |
|  | | DSPC | | | POPC | | Chol | |
| Ld phase | | 0.09 | | | 0.79 | | 0.12 | |
| Lo phase | | 0.49 | | | 0.26 | | 0.25 | |
| Co-existing | | 0.39 | | | 0.39 | | 0.22 | |
| **Mole Fractions Used for Neutron Experiments** | | | | | | | | |
|  | DSPC | | d70-DSPC | POPC | | d31-POPC | Chol | d41-Chol |
| S9 Fig  upper panel (contrast if de-mixed) | 0.13 | | 0.26 | 0.39 | | 0.00 | 0.22 | 0.00 |
| S9 Fig  lower panel (uniform in all cases) | 0.31 | | 0.12 | 0.14 | | 0.25 | 0 | 0.22 |
| **Neutrons Scattering Length Density (fm/Å3)** | | | | | | | | |
|  | | Avg. SLD | | | Head Group SLD | | Acyl SLD | |
| Solvent (34.5% D2O) | | 0.18 | | |  | |  | |
| Ld phase (S9 Fig upper panel – de-mixed) | | 0.06 | | | 0.18 | | 0.02 | |
| Lo phase (S9 Fig upper panel – de-mixed) | | 0.23 | | | 0.18 | | 0.25 | |
| Avg. (mixed) (S9 Fig upper panel) | | 0.19 | | | 0.18 | | 0.19 | |
|  | | | | | | | | |
| Ld phase (S9 Fig lower panel – de-mixed) | | 0.19 | | | 0.18 | | 0.19 | |
| Lo phase (S9 Fig lower panel– de-mixed) | | 0.19 | | | 0.18 | | 0.20 | |
| Avg. (mixed) (S9 Fig lower panel) | | 0.19 | | | 0.18 | | 0.20 | |

**References:**

1. Bishop D, Rutberg L, Samuelsson B. The Chemical Composition of the Cytoplasmic Membrane of *Bacillus Subtilis*. Eur J Biochem. 1967;2(4):448–53.
2. Sears VF. Neutron Scattering Lengths and Cross Sections. Neutron News. 1992;3(3):26-37.
3. Zamyatnin A. Amino Acid, Peptide, and Protein Volume in Solution. Annu Rev Biophys Bioeng. 1984;13(1):145–65.
4. Midgley JEM. The Nucleotide Base Composition of Ribonucleic Acid from Several Microbial Species. Biochim Biophys Acta. 1962;61(4):513–25.
5. Voss N, Gerstein M. Calculation of Standard Atomic Volumes for Rna and Comparison with Proteins: Rna Is Packed More Tightly. J Mol Biol. 2005;346(2):477–92
6. Kunst F, Ogasawara N, Moszer I, Albertini AM, Alloni G, Azevedo V*, et al.* The Complete Genome Sequence of the Gram-Positive Bacterium *Bacillus Subtilis*. Nature. 1997;390(6657):249–56.
7. Nadassy K, Tomás-Oliveira I, Alberts I, Janin J, Wodak SJ. Standard Atomic Volumes in Double-Stranded DNA and Packing in Protein–DNA Interfaces. Nucleic Acids Res. 2001;29(16):3362–76.
8. Li J, Revol JF, Marchessault RH. Rheological Properties of Aqueous Suspensions of Chitin Crystallites. J Colloid Interface Sci. 1996;183(2):365–73.
9. Sauer U, Hatzimanikatis V, Hohmann H-P, Manneberg M, Van Loon A, Bailey JE. Physiology and Metabolic Fluxes of Wild-Type and Riboflavin-Producing *Bacillus Subtilis*. Appl Environ Microbiol. 1996;62(10):3687–96.
10. Moura A, Savageau MA, Alves R. Relative Amino Acid Composition Signatures of Organisms and Environments. PLoS ONE. 2013;8(10):e77319.
11. Antoniewicz MR, Kelleher JK, Stephanopoulos G. Accurate Assessment of Amino Acid Mass Isotopomer Distributions for Metabolic Flux Analysis. Anal Chem. 2007;79(19):7554–9.
12. Armen RS, Uitto OD, Feller SE. Phospholipid Component Volumes: Determination and Application to Bilayer Structure Calculations. Biophys J. 1998;75(2):734–44.
13. Heberle F, Petruzielo R, Pan J, Drazba P, Kučerka N, Standaert R, et al. Bilayer Thickness Mismatch Controls Domain Size in Model Membranes. J Am Chem Soc. 2013;135(18):6853–9.
14. Nickels JD, Cheng X, Mostofian B, Stanley C, Lindner B, Heberle FA, et al. Mechanical Properties of Nanoscopic Lipid Domains. J Am Chem Soc. 2015;137(50):15772–80.
15. Konyakhina TM, Goh SL, Amazon J, Heberle FA, Wu J, Feigenson GW. Control of a Nanoscopic-to-Macroscopic Transition: Modulated Phases in Four-Component DSPC/DOPC/POPC/Chol Giant Unilamellar Vesicles. Biophys J. 2011;101(2):L8–L10.
